# Supplementary material for: Reactive Deep Eutectic Solvents (RDESs): A New Tool for Phospholipase D-Catalyzed Preparation of Phospholipids
Source: MDPI journal article supplement (doi:10.3390/catal11060655), 2021-05-22
Supplement: s1 [file s1]

# Reactive Deep Eutectic Solvents (RDESs): a new tool for phospholipase D-catalyzed preparation of phospholipids

Chiara Allegretti<sup>1</sup>, Francesco G. Gatti<sup>1</sup>, Stefano Marzorati<sup>2</sup>, Letizia Rossato<sup>1</sup>, Stefano Serra<sup>2</sup>, Alberto Strini<sup>3</sup> and Paola D'Arrigo<sup>1,2\*</sup>

<sup>1</sup> Department of Chemistry, Materials and Chemical Engineering "Giulio Natta", Politecnico di Milano, p.zza L. da Vinci 32, Milano 20133, Italy; chiara.allegretti@polimi.it (C.A.); francesco.gatti@polimi.it (F.G.G.); letiziaanna.rossato@polimi.it (L.A.M.R.)

<sup>2</sup> Istituto di Scienze e Tecnologie Chimiche "Giulio Natta", Consiglio Nazionale delle Ricerche (SCITEC-CNR), via Luigi Mancinelli 7, Milano 20131, Italy; stefano.marzorati@scitec.cnr.it (S.M.); stefano.serra@cnr.it (S.S.)

<sup>3</sup> Istituto per le Tecnologie della Costruzione, Consiglio Nazionale delle Ricerche (ITC-CNR), via Lombardia 49, San Giuliano Milanese 20098, Italy; alberto.strini@itc.cnr.it (A.S.)

\* Correspondance: paola.darrigo@polimi.it (P.D.); phone: + 39-2-23993075; fax: + 39-2-23993180

## Supplementary Materials

**Figure S1.** RDES preparation example (left image: initial mixture of ChCl (HBD) and ethylene glycol (HBA), right image: RDES A2). 2

**Figure S2.** <sup>1</sup>H NMR spectra of the four RDES A1, A2, B1 and B2 in D<sub>2</sub>O. 3

**Figure S4.** Mass spectra of PG<sub>A1</sub> obtained in RDES A1. ....4

**Figure S5.** Mass spectra of PG<sub>B1</sub> obtained in RDES B1. ....5

**Figure S6.** Mass spectra of P-EG<sub>A2</sub> obtained in RDES A2. ....6

**Figure S7.** Mass spectra of P-EG<sub>B2</sub> obtained in RDES B2. ....7

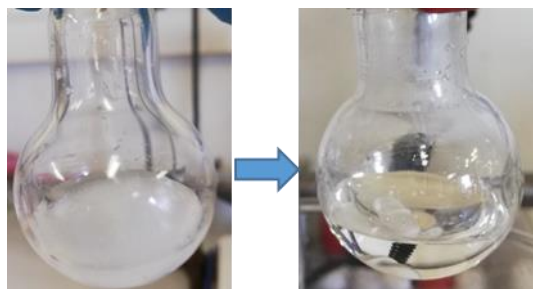

**Figure S1.** RDES preparation example (left image: initial mixture of ChCl (HBD) and ethylene glycol (HBA), right image: RDES A2).

RDES A1

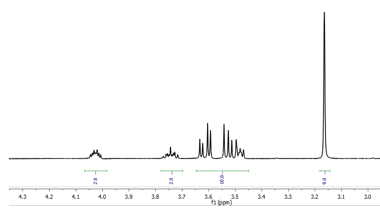

RDES B1

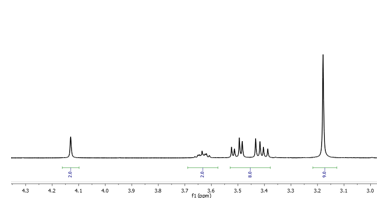

RDES A2

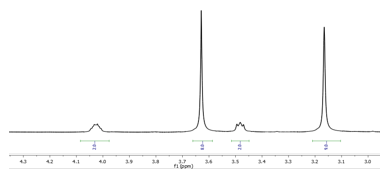

RDES B2

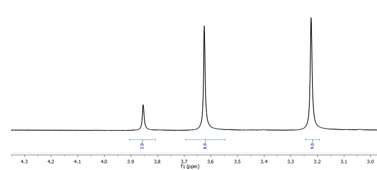

**Figure S2.**  $^1\text{H}$  NMR spectra of the four RDES A1, A2, B1 and B2 in  $\text{D}_2\text{O}$ .

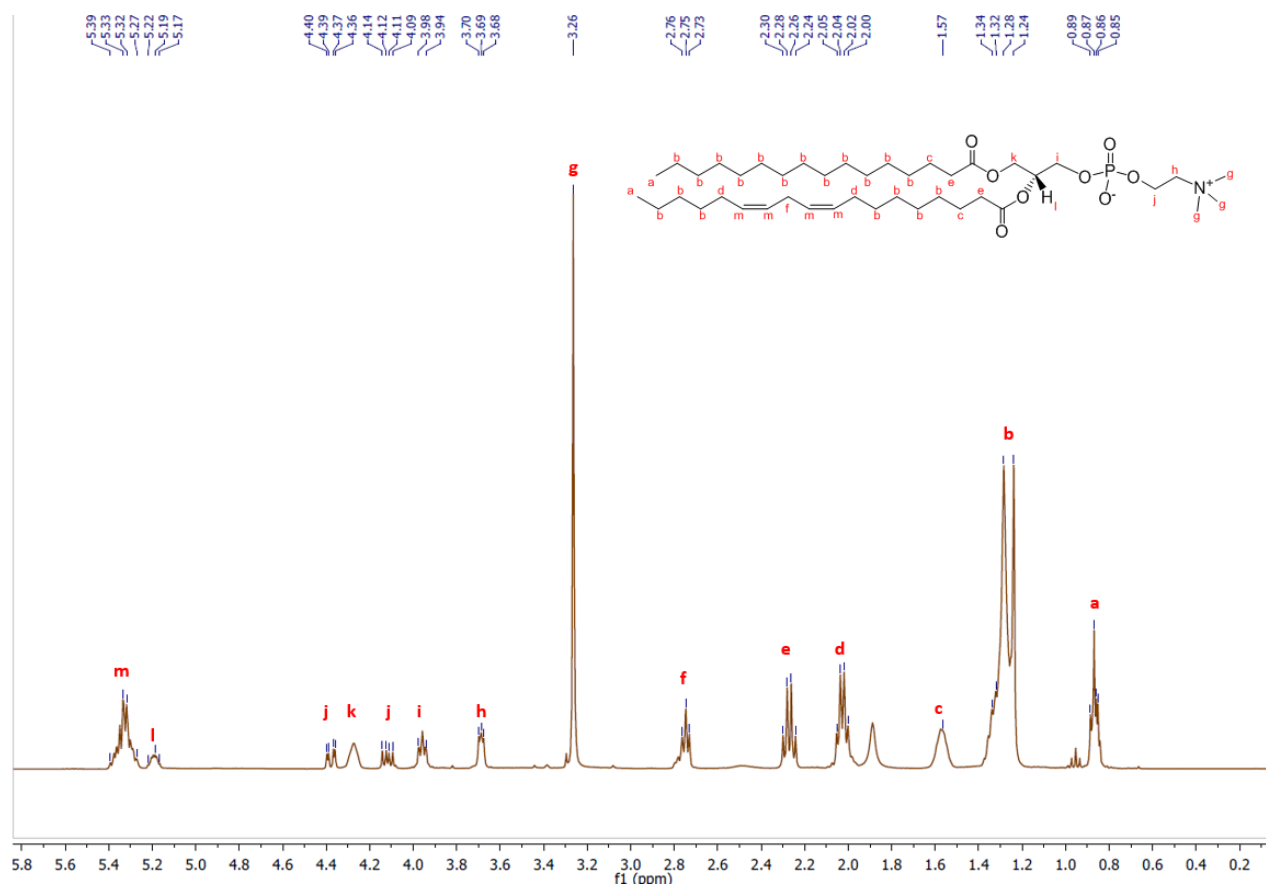

**Figure S3.** <sup>1</sup>H NMR Spectrum of PC (reported as 1-palmitoyl-2-linoleyl-PC) with signals attribution.

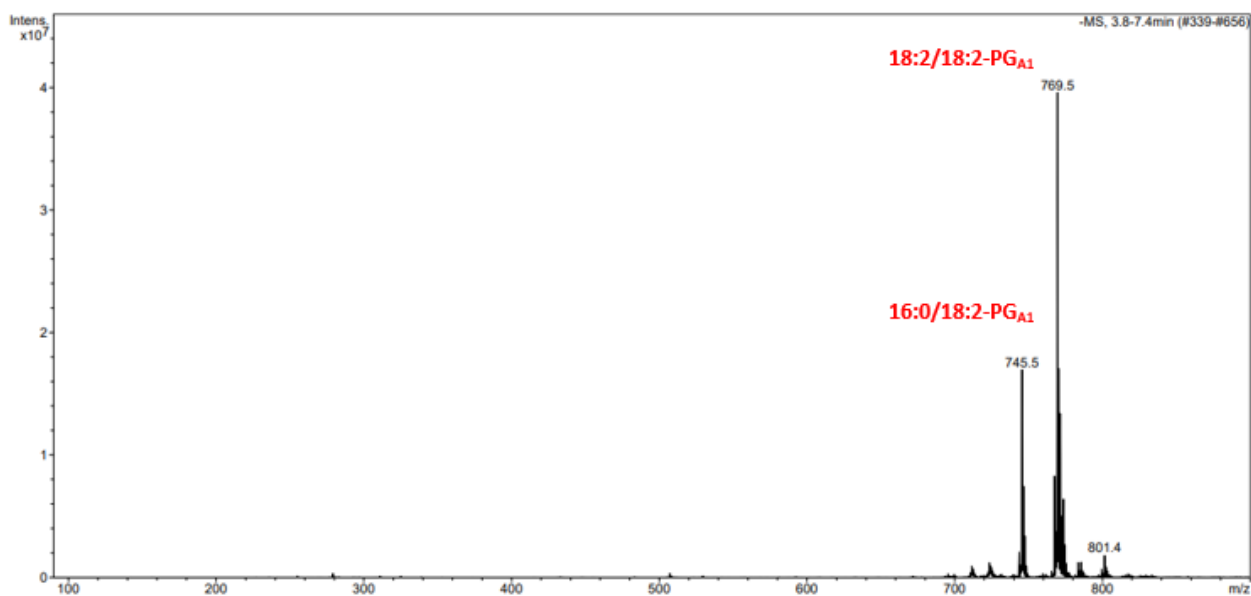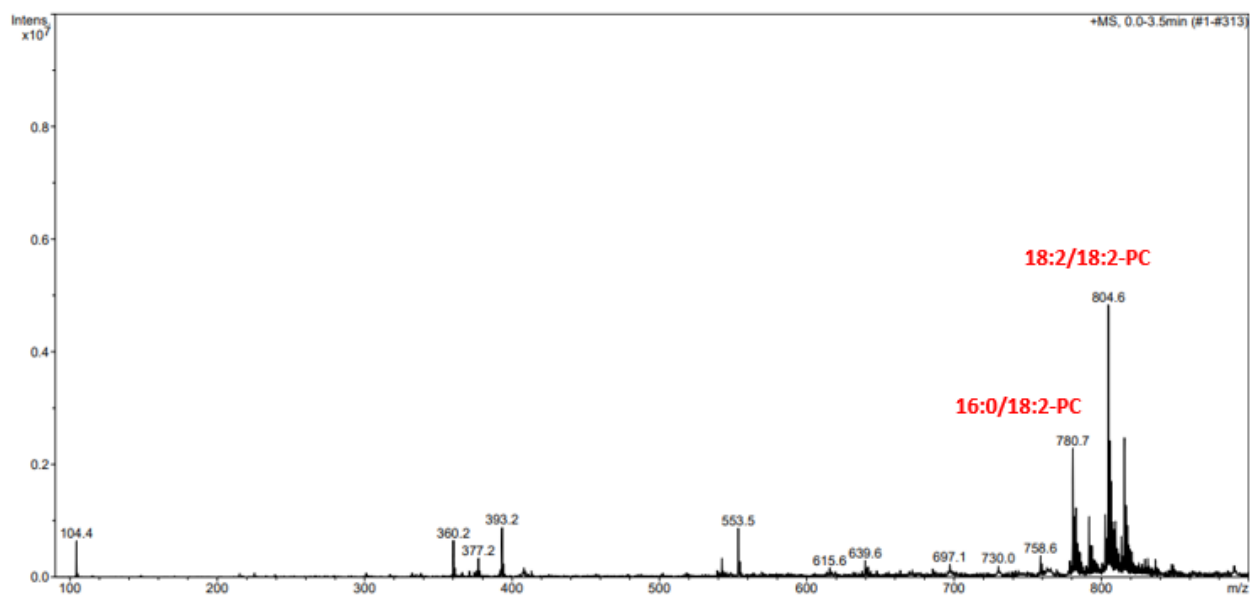

**Figure S4.** Mass spectra of PG<sub>A1</sub> obtained in RDES A1.

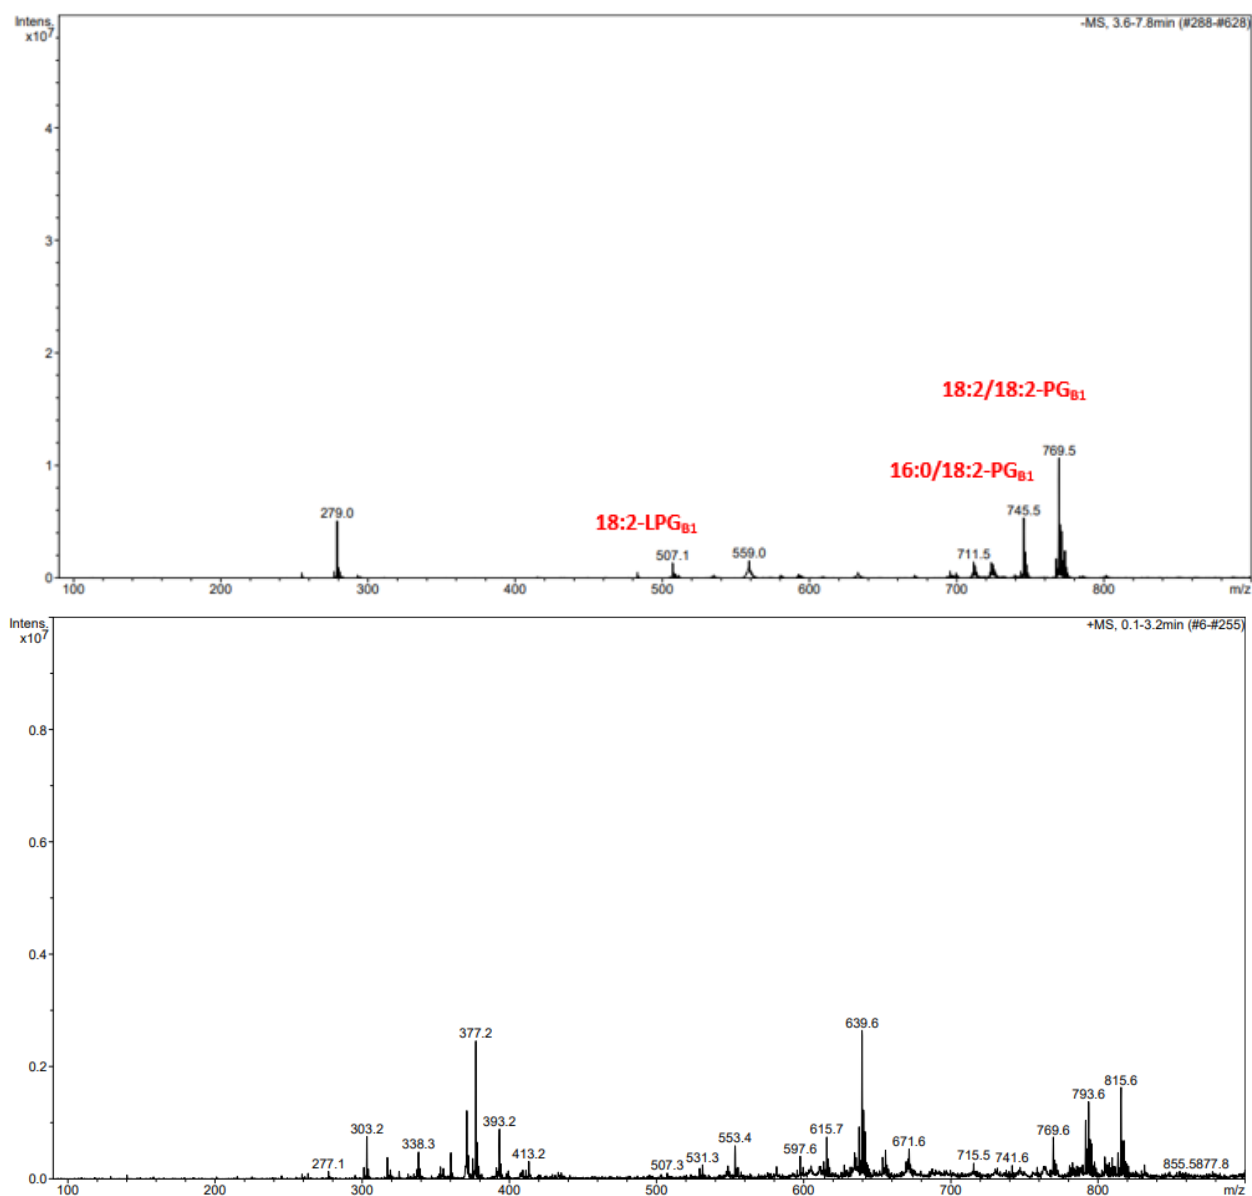

**Figure S5.** Mass spectra of  $\text{PG}_{\text{B1}}$  obtained in RDES B1.

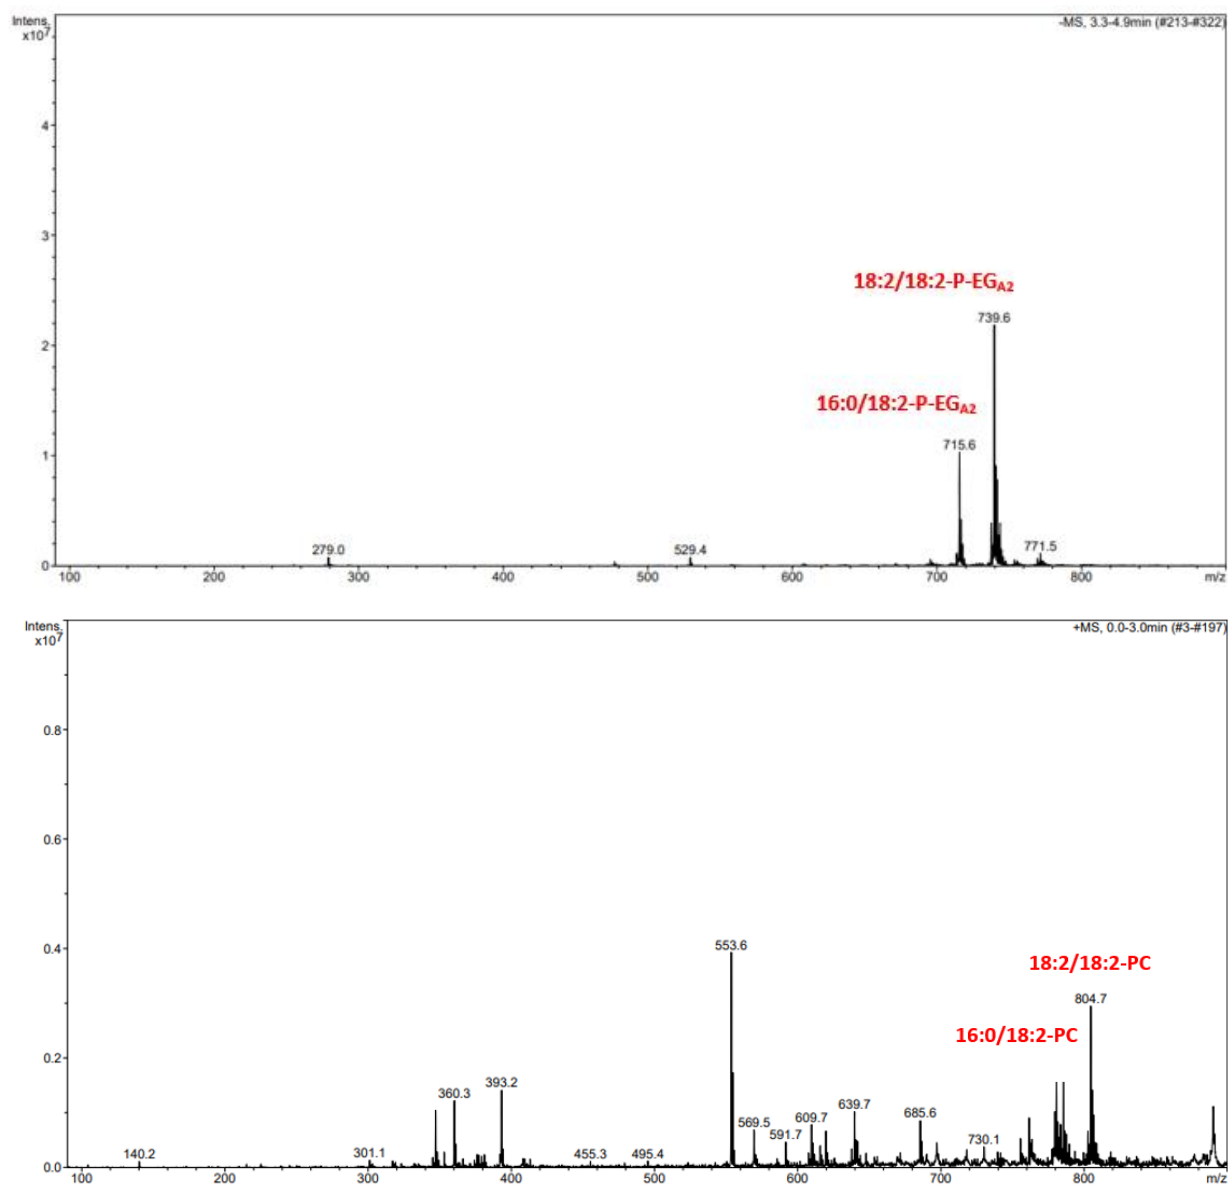

**Figure S6.** Mass spectra of P-EG<sub>A2</sub> obtained in RDES A2.

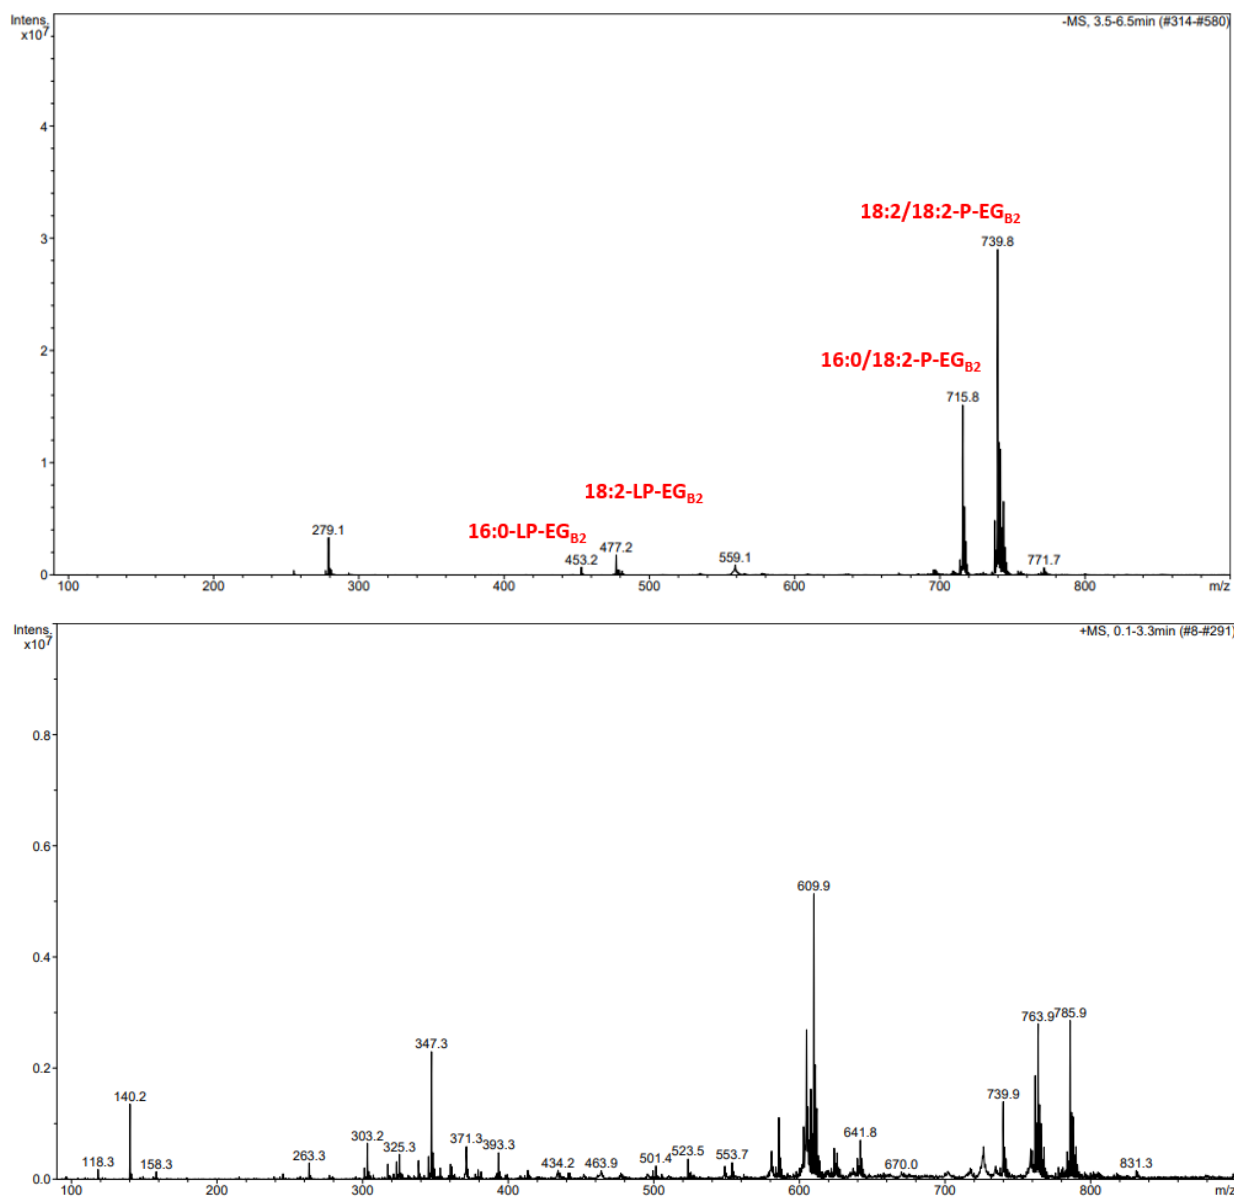

**Figure S7.** Mass spectra of P-EG<sub>B2</sub> obtained in RDES B2.
